# Supplementary material
Source: PubMed Central journal article supplement (PMC3277532)
Supplement: 1120753109_pnas.201120753SI.pdf [file 1120753109_pnas.201120753SI.pdf]

# Supporting Information

Amos-Landgraf et al. 10.1073/pnas.1120753109

## SI Materials and Methods

**1. Model.** Two probability models were used to analyze bivariate allelic ratios of mutant genomic DNA (gDNA) and mutant cDNA. The first model was a discrete Gaussian mixture model that provides for model-based clustering of the samples into three tumor classes. The class-specific mean parameters were constrained, and therefore, the expected gDNA value in the maintenance of heterozygosity of *adenomatous polyposis coli* (*Apc*) in gDNA and cDNA (gMOH/cMOH) class equaled the expected gDNA value in the gMOH/complementary loss of heterozygosity (cLOH) class; similarly, the expected cDNA values in classes gLOH/cLOH and gMOH/cLOH were constrained to be equal, which was justified by the measurement process. Otherwise, each class was allowed to have an unconstrained  $2 \times 2$  covariance matrix. Owing to mean constraints, standard software could not be applied to fit the probability model; custom R code was developed to implement the expectation maximization algorithm and thus, estimate the means, covariances, and mixing proportions by the method of maximum likelihood. Data from normal tissues were included in the estimation but forced to arise from the gMOH/cMOH class.

A second model was developed to analyze the allelic ratios. This admixture model aimed to go farther than the discrete mixture model by representing each tumor as a mixture of cells of three different pure cell types. Computations in this admixture model were more complex than the computations required for the first model, and they are developed fully here. We analyzed the polyposis in the rat colon (Pirc) and Rb9 data separately. The  $n$  tissue samples from one experiment provided bivariate data,  $DAT = \{(X_i, Y_i) : i = 1, 2, \dots, n\}$ , measuring mutant allele ratios in gDNA and cDNA, respectively. In the admixture model, the samples  $\{i\}$  produced mutually independent data points. Furthermore, sample  $i$  was considered to be comprised of fractions of three pure cell types, with the fractions  $U_{i,j} \geq 0$  and  $\sum_{j=1}^3 U_{i,j} = 1$ . None of these fractions were observed, except for cases  $i$  that were normal tissue controls, for which we assumed  $U_i = (U_{i,1}, U_{i,2}, U_{i,3}) = (1, 0, 0)$ . For each tumor, the admixture vector  $U_i$  itself was viewed as a random draw from an unknown distribution  $\pi(u)$  over the simplex  $S_3 = \{u = (u_1, u_2, u_3) : u_j \geq 0, \sum_j u_j = 1\}$ . Computations were enabled by taking a finite-grid approximation to  $S_3$  and thus, a vector approximation to  $\pi$ .

|   | Cell type | Fraction  |
|---|-----------|-----------|
| 1 | gMOH/cMOH | $U_{i,1}$ |
| 2 | gLOH/cLOH | $U_{i,2}$ |
| 3 | gMOH/cLOH | $U_{i,3}$ |

We supposed that measurements of gDNA and cDNA on a pure tissue comprised only of cells of one type would be bivariate normal, with means and variances that depended on the cell type but without any correlation in the measurement error. The lack of correlation between gDNA and cDNA measurements on pure tissue was a key assumption that allowed us to infer admixture rates in the actual tissue samples. It was justified considering that pyrosequencing was performed separately for gDNA and cDNA material and that variation attributable to the initial isolation of all nucleic acids from the tissue was probably negligible. We also assumed that the distribution of data in one channel (gDNA or cDNA) was not

affected by state of the other channel. In other words, for mean parameters  $a_1, a_2, b_1,$  and  $b_2$ , the mean gDNA measurement in pure gMOH cells was  $a_1$ , and the mean gDNA measurement in gLOH cells was  $a_2$ . Similarly the mean cDNA measurement in cMOH cells was  $b_1$ , and the mean cDNA measurement in cLOH cells was  $b_2$ . Fig. S4 shows these parameters as estimated from the Pirc dataset.

The contribution to gDNA/cDNA measurements ( $X_i, Y_i$ ) from the pure cells of one type was assumed to be normally distributed, where the bivariate mean depended on the type and there was one variance parameter for gDNA and one variance parameter for cDNA, regardless of type. A key element was having independent measurement errors in these pure cells (the apparent marginal correlation in data arose from admixture). Thus,  $X_i$  and  $Y_i$  were treated as independent given admixture rates  $U_i$ , with gDNA data following (Eq. S1)

$$X_i | (U_i = u) \sim \text{Normal} \left\{ \begin{aligned} \text{mean} &= (u_1 + u_3)a_1 + u_2a_2, \\ \text{variance} &= \sigma_a^2(u_1^2 + u_2^2 + u_3^2) \end{aligned} \right\} \quad [\text{S1}]$$

and cDNA data following (Eq. S2)

$$Y_i | (U_i = u) \sim \text{Normal} \left\{ \begin{aligned} \text{mean} &= u_1b_1 + (u_2 + u_3)b_2, \\ \text{variance} &= \sigma_b^2(u_1^2 + u_2^2 + u_3^2) \end{aligned} \right\}. \quad [\text{S2}]$$

Conditional on the admixture rates, the unknown parameters were  $\theta = (a_1, b_1, a_2, b_2, \sigma_a^2, \sigma_b^2)$ .

**2. Inference.** The unknown objects were mean and variance parameters in the vector  $\theta$ , admixture vectors  $\{U_i = (U_{i,1}, U_{i,2}, U_{i,3})\}$ , and the probability distribution  $\pi(u)$  over the simplex  $S_3$ . We placed a prior distribution on  $\theta$  and  $\pi(u)$  and developed Bayesian computations by Markov chain Monte Carlo to simulate the distribution of these unknowns conditional on data  $DAT$ . We approximated the simplex  $S_3$  by a finite grid of proportion vectors, denoted  $u_{grid}$  in the R code. This matrix was size  $861 \times 3$  holding row vectors that represent possible realizations of each admixture vector  $U_i$ .  $K = 861$  came by taking a regular  $40 \times 40$  grid over the unit square, keeping coordinates for which the values sum to less than one and considering these two values to be the first two entries of a possible admixture vector (the third being one minus the sum). Thus,  $\pi$  was a length  $K = 861$  vector holding the probability distribution governing the  $U_i$  values. In the Bayesian analysis, we placed a conjugate exchangeable Dirichlet prior over  $\pi$ , using a small prior mass  $\alpha = 1$  (S3):

$$\pi \sim \text{Dirichlet}_K \left( \frac{\alpha}{K}, \frac{\alpha}{K}, \dots, \frac{\alpha}{K} \right). \quad [\text{S3}]$$

Next, we placed a noninformative flat prior on the mean parameters  $a_1, a_2, b_1, b_2$  in  $\theta$ , except that we insisted that all mean values exceed zero. We placed a weakly informative conjugate inverse-Gamma prior for the two variance parameters  $\sigma_a^2$  and  $\sigma_b^2$ . We used a prior guess  $\sigma_0^2 = 25$ , with  $n_0 = 1$ . That is, the prior for each inverse variance was Gamma with shape  $n_0/2$  and rate  $n_0\sigma_0^2/2$ . Evidently, the posterior information was relatively

high, and we would have computed very similar estimates for a wide range of prior hyperparameters.

We developed a systematic scan Gibbs sampler with separate updates for the means and variances in  $\theta$ , the admixture vectors, and the mixing proportions  $\pi$ . (The following three subsections describe details of the Gibbs sampler.) After preliminary testing, we ran the sampler for 500,000 scans, saving 1 in each 100 states and basing posterior estimates on 5,000 putative draws from the joint posterior distribution. Output analysis indicated very good mixing of the Markov chain. Mean values of the output were used for parameter estimation.

**2.1. Updating  $\theta$ .** The gDNA and cDNA measurements  $X_i$  and  $Y_i$  were conditionally independent given the admixture vector  $U_i$ . The parameters  $a_1, a_2, \sigma_a^2$  refer to the distribution of  $X_i$ , and  $b_1, b_2, \sigma_b^2$  refer to the distribution of  $Y_i$ . Considering the similarity of gDNA and cDNA models, we show here only the Gibbs sample update rules for the parameters governing  $X_i$ . Re-expressing the observation model from the previous section, we have (S4)

$$X_i | \text{else} \sim \text{Normal}(c_i^T \mu, d_i \sigma_a^2), \quad [\text{S4}]$$

where  $d_i = U_{i,1}^2 + U_{i,2}^2 + U_{i,3}^2$  multiplied by variance  $\mu = (a_1, a_2)^T$  holds the pure cell means, and (Eq. S5)

$$c_i = \begin{pmatrix} c_{i,1} \\ c_{i,1} \end{pmatrix} = \begin{pmatrix} U_{i,1} + U_{i,3} \\ U_{i,2} \end{pmatrix}. \quad [\text{S5}]$$

(In both  $c_i$  and  $d_i$ , the roles of  $U_{i,1}$  and  $U_{i,2}$  are reversed when considering the cDNA data  $Y_i$ .) Using standard Bayesian arguments and a flat prior, we find the full-conditional distribution for the mean parameters  $a_1$  and  $a_2$  is (S6)

$$\begin{pmatrix} a_1 \\ a_1 \end{pmatrix} | \text{else} \sim \text{Normal} \left\{ \begin{pmatrix} m_1 \\ m_2 \end{pmatrix}, \begin{bmatrix} s_{1,1} & s_{1,2} \\ s_{1,2} & s_{2,2} \end{bmatrix} \right\}, \quad [\text{S6}]$$

where posterior means are (Eq. S7)

$$m_1 = \frac{1}{1 - \frac{C^2}{B_1 B_2}} \left( \frac{A_1}{B_1} - \frac{A_2 C}{B_1 B_2} \right) \quad [\text{S7}]$$

and (Eq. S8)

$$m_2 = \frac{1}{1 - \frac{C^2}{B_1 B_2}} \left( \frac{A_2}{B_2} - \frac{A_1 C}{B_1 B_2} \right). \quad [\text{S8}]$$

The posterior covariance matrix is (Eq. S9)

$$\begin{bmatrix} s_{1,1} & s_{1,2} \\ s_{1,2} & s_{2,2} \end{bmatrix} = \frac{1}{B_1 B_2 - C^2} \begin{bmatrix} B_2 & -C \\ -C & B_1 \end{bmatrix}. \quad [\text{S9}]$$

The contributing quantities are (Eq. S10)

$$A_1 = \sum_{i=1}^n \frac{1}{d_i \sigma_a^2} x_i c_{i,1}, \quad [\text{S10}]$$

(Eq. S11)

$$A_2 = \sum_{i=1}^n \frac{1}{d_i \sigma_a^2} x_i c_{i,2}, \quad [\text{S11}]$$

(Eq. S12)

$$B_1 = \sum_{i=1}^n \frac{1}{d_i \sigma_a^2} c_{i,1}^2, \quad [\text{S12}]$$

(Eq. S13)

$$B_2 = \sum_{i=1}^n \frac{1}{d_i \sigma_a^2} c_{i,2}^2, \quad [\text{S13}]$$

and (Eq. S14)

$$C = \sum_{i=1}^n \frac{1}{d_i \sigma_a^2} c_{i,1} c_{i,2}. \quad [\text{S14}]$$

Thus, the Gibbs update of  $a_1$  and  $a_2$  arose from the bivariate normal posterior given in expression S6. We sampled it by sampling the marginal of  $a_1$  and then, the induced conditional of  $a_2$  given  $a_1$ . We imposed the constraint of  $a_1, a_2 > 0$  in both updates.

Under the conjugate inverse-Gamma prior indicated above, the variance parameter  $\sigma_a^2$  has an inverse-Gamma full-conditional distribution. More specifically (Eq. S15),

$$\begin{aligned} \frac{1}{\sigma_a^2} | \text{else} \sim \text{Gamma} & \left\{ \text{shape} = \frac{n_0 + n}{2}, \text{rate} \right. \\ & \left. = \frac{1}{2} \left( n_0 \sigma_0^2 + \sum_{i=1}^n \frac{(x_i - c_i^T \mu)^2}{d_i} \right) \right\}. \end{aligned} \quad [\text{S15}]$$

Analogous updates for the  $Y_i$  parameters  $b_1, b_2$ , and  $\sigma_b^2$  are as above but with the roles of  $U_{i,1}$  and  $U_{i,2}$  reversed.

**2.2. Updating admixture vectors.** Tumor  $i$  has admixture vector  $U_i$ , which has a complicated but discrete conditional distribution over the  $K$  possible rows in ugrid given the data and the parameters  $\theta$  and  $\pi = (\pi_u)$ . For a row  $u$  of ugrid, we have (Eq. S16)

$$P(U_i = u | \text{DAT}, \theta, \pi) \propto p(x_i | u, \theta) p(y_i | u, \theta) \pi_u. \quad [\text{S16}]$$

In our implementation, we find the logarithm of the right-hand side by invoking the normal model from *SI Materials and Methods*, 2.1. and the estimated sampling model for  $U_i$ . We renormalize for each  $i$  to get the full conditional distribution for each  $U_i$  and then run the Gibbs update by sampling these discrete distributions one time each in parallel.

**2.3. Updating mixing proportions.** Given everything else, the vector  $\pi$  depends only on how many admixture vectors take each of the possible values in ugrid. By conjugacy of the Dirichlet relative to these multinomial counts (S17),

$$\pi | \text{else} \sim \text{Dirichlet}_K \left( \frac{\alpha}{K} + s_1, \frac{\alpha}{K} + s_2, \dots, \frac{\alpha}{K} + s_K \right), \quad [\text{S17}]$$

where  $s_j$  counts how many  $U_i$  values take value ugrid[j,]. This sample is by renormalizing independent and properly Gamma-distributed variables.

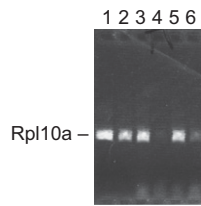

**Fig. S1.** RT-PCR for the ribonuclear protein subunit *Rpl10a* in mouse Rb9-*Multiple intestinal neoplasia (Min)* tumors to assess cDNA qualitatively. Lanes 1 and 2 are tumors that maintained heterozygosity of *Apc* in the DNA fraction but were below the level of detection by pyrosequencing of cDNA for *Apc*. Lanes 3–6 are other mouse tumors, both positive and negative for cDNA.

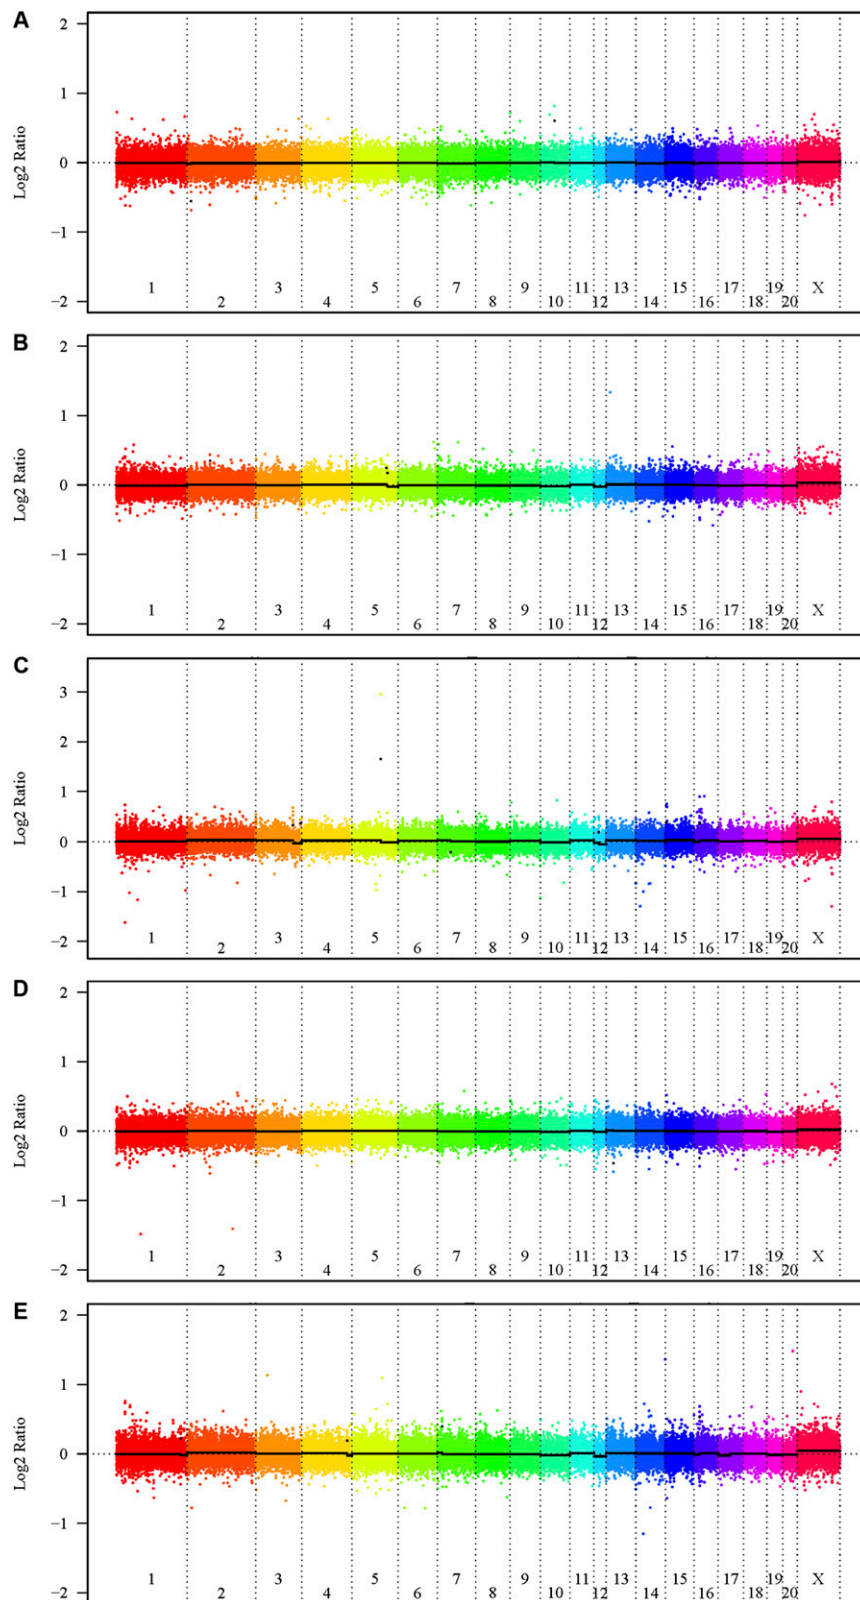

**Fig. S2.** Array comparative genomic hybridization (aCGH) was performed using Nimblegen rat whole-genome arrays and two-color labeling (Cy5 and Cy3) with tumor and normal spleen DNA. Two male F344-Pirc animals and one age-matched male F344/Tac WT rat were killed at 9 mo of age. From each F344-Pirc animal (P1 and P2), DNA was isolated immediately after necropsy, starting with 50 mg from the largest single colonic tumor and spleen. DNA was extracted using the Qiagen DNeasy tissue kit. Comparative genomic hybridizations were performed by Nimblegen Systems in their manufacturing facilities in Iceland using the Nimblegen RGSC 3.4 isothermal rat aCGH chip with 385,000 unique sequence features and a median probe density of 5,303 bp. One aliquot of tumor (T) and spleen (S) DNA from each animal was labeled with Cy5, and a second aliquot was labeled with Cy3. Spleen DNA sample P1S was hybridized against WT spleen DNA (A). Reciprocal hybridizations of Cy5 and Cy3 were performed: P1T vs. P1S (B and C). Similarly, Reciprocal hybridizations of P2T and P2S were performed (D and E). aCGH plots were generated using NimbleScan software, and the data were analyzed using SignalMap v1.8.



**Table S1. LOH analysis of gDNA from F1-Pirc tumors using quantitative allele-specific pyrosequencing**

| Marker  | Chr | Position (Mb) | Contribution of F344 allele (%) |                              |
|---------|-----|---------------|---------------------------------|------------------------------|
|         |     |               | Tumor X                         | Other tumors (mean $\pm$ SD) |
| SNP-76  | 1p  | 7             | 48.1                            | 49.3 $\pm$ 3.0               |
| SNP-102 | 1q  | 46            | 47.8                            | ND                           |
| SNP-82  | 1q  | 131           | <b>84.7</b>                     | 53.4 $\pm$ 0.6               |
| SNP-75  | 1q  | 159           | <b>78.7</b>                     | 49.5 $\pm$ 1.4               |
| SNP-83  | 1q  | 232           | <b>78.3</b>                     | 43.5 $\pm$ 1.8               |
| SNP-2   | 1q  | 233           | <b>85.8</b>                     | 54.8 $\pm$ 3.1               |
| Pirc    | 18p | 27            | <b>85.0</b>                     | 83.5 $\pm$ 15.1*             |
| SNP-33  | 18q | 83            | 49.4                            | 51.2 $\pm$ 3.3               |

SNPs across the genome were used to detect significant deviations from the expected 50% contribution from each of the parental strains. Tumor X showed LOH on Chr 1q, with a cross-over between 46 and 131 Mb. Allele ratios in bold show gLOH on one arm of the salient chromosome. Seven other tumors from the same animal serve as controls. Chr, chromosome; ND, not done.

\*Six tumors were evaluated for Pirc.

**Table S2. Mutations to *Apc* in gMOH/cMOH F1-Pirc tumors**

| Mutation type | Position on Chr. 18 | Position in <i>Apc</i> | Treatment |
|---------------|---------------------|------------------------|-----------|
| T to C        | 26,782,134          | Intron 13              | DSS       |
| C to T        | 26,783,847          | Exon 15                | None      |
| C to T        | 26,784,615          | Exon 15                | DSS       |

The mutation type and base pair position (rat genome build Baylor 3.4, November 2004) of the three identified *Apc* mutations of the 12 gMOH tumors sequenced. Chr, chromosome; DSS, dextran sulfate sodium.

**Table S3. Admixture probabilities for Rb9-Min and F1-Pirc tumors**

| Model   | Tumor category | Probability (majority) | Probability (plurality) |
|---------|----------------|------------------------|-------------------------|
| Rb9-Min | gMOH/cMOH      | 0.33                   | 0.45                    |
| Rb9-Min | gLOH/cLOH      | 0.43                   | 0.51                    |
| Rb9-Min | gMOH/cLOH      | 0.02                   | 0.04                    |
| F1-Pirc | gMOH/cMOH      | 0.19                   | 0.19                    |
| F1-Pirc | gLOH/cLOH      | 0.63                   | 0.68                    |
| F1-Pirc | gMOH/cLOH      | 0.12                   | 0.13                    |

The admixture probabilities for the majority or plurality of cells of each of the three tumor cell classes present in a given sample for both Rb9-Min and F1-Pirc as described in *SI Materials and Methods*.

**Table S4. Primers**

| Primer name   | Location                        | Forward                            | Reverse                    | Sequencing         | SNP with surrounding sequence       |
|---------------|---------------------------------|------------------------------------|----------------------------|--------------------|-------------------------------------|
| Apc Alt-F     | chr18: 26,777,147 + 26,777,166  | GCAAGTGTITTCGGGAATTT               | NA                         | NA                 | NA                                  |
| Apc Alt-R1    | chr18: 26,782,136 + 26,782,155  | NA                                 | AGAGTTGATTCCTATTCTG        | NA                 | NA                                  |
| Apc Alt-R2    | chr18: 26,782,307 + 26,782,326  | NA                                 | ACATTCGTAATATCCCACC        | NA                 | NA                                  |
| APC Alt       | chr18: 26,720,834 + 26,721,818  | CCAGTCACTCGGTTCTGTCA               | TACCACTGCTGTGTCCTTG        | NA                 | NA                                  |
| Promoter      |                                 |                                    |                            |                    |                                     |
| Apc Promoter  | chr18: 26,731,661 + 26,732,322  | GAATGGCTGGAGTTCCTTGG               | TGCTCAGTTCACAGTTCGT        | NA                 | NA                                  |
| Apc Exon 1    | chr18: 26,732,010 + 26,732,410  | CCCATGTCCTCTCTAG                   | TGCTTAGCTATCCCAAGTTACAA    | NA                 | NA                                  |
| Apc Exon 2    | chr18: 26,739,223 + 26,739,623  | TGGCATGTTGTCAAGTGTAA               | GATCTGAGGGGAAAACGTCAA      | NA                 | NA                                  |
| Apc Exon 3    | chr18: 26,739,951 + 26,740,394  | CTGACTTTCAGGGCAAGTT                | CAGGTGCCACATCATCT          | NA                 | NA                                  |
| Apc Exon4     | chr18: 26,742,943 + 26,743,399  | TAGCAGGAAAGGACACACT                | AATGACGACGGTGACACTCA       | NA                 | NA                                  |
| Apc Exon 5    | chr18: 26,747,107 + 26,747,506  | TCATAGTTTGGATTCCTTGAAGA            | TTTGATGGTGTGCAGGTTA        | NA                 | NA                                  |
| Apc Exon 6    | chr18: 26,751,039 + 26,751,389  | TTGAAAGCAGAAGCCAAAG                | CGCATGTAAACAAAAGGGACT      | NA                 | NA                                  |
| Apc Exon 7    | chr18: 26,762,128 + 26,762,608  | TGAGAGACACATCTGGTG                 | TCCGAGCATAAAACATTC         | NA                 | NA                                  |
| Apc Exon 8    | chr18: 26,766,510 + 26,766,983  | CTGCAGTCTGCTGTTGT                  | GTCTGGAGCTTAGGCTGCTC       | NA                 | NA                                  |
| Apc Exon 9    | chr18: 26,768,835 + 26,769,655  | TGACCTTTAACTGATGCTGACAA            | TTTTTCAGGGAAATGCAGATT      | NA                 | NA                                  |
| Apc Exon 10   | chr18: 26,770,811 + 26,771,210  | AGCTGGCTGTTCTCTGT                  | AATGATGGAAGACAGCTGAA       | NA                 | NA                                  |
| Apc Exon 11   | chr18: 26,775,431 + 26,775,923  | CTGGCAGGGAGTGAAATTGT               | CAGTGTGAGAAAAGGGCTTC       | NA                 | NA                                  |
| Apc Exon 12   | chr18: 26,776,233 + 26,776,784  | TTTCATTTGGCAGTTTGTTC               | TTGGTTAGGAATGCTCCAC        | NA                 | NA                                  |
| Apc Exon 13   | chr18: 26,776,833 + 26,777,287  | GGGAAAACCTATGTTCTGAAGC             | CTATTCTGACCCACATTTT        | NA                 | NA                                  |
| Apc Exon 14   | chr18: 26,782,006 + 26,782,505  | TGCATCATGAAAGATACGTG               | TGGAGTTGATAGTGGTCTCACA     | NA                 | NA                                  |
| Apc Exon 15-1 | chr18: 26,783,492 + 26,784,011  | ACGATGCGATGTGAACGTA                | CCCCATAGCCATCATTTTGT       | NA                 | NA                                  |
| Apc Exon 15-2 | chr18: 26,783,179 + 26,784,469  | TGCTCAAGTGTCTTTGGAC                | GAAGAGTTCCTGGGATTTT        | NA                 | NA                                  |
| Apc Exon 15-3 | chr18: 26,784,077 + 26,785,123  | GTCTCCCTGCAAGCTTTGAC               | TGCTGTGGAACCTGAGGTTG       | NA                 | NA                                  |
| Apc Exon 15-4 | chr18: 26,785,044 + 26,786,394  | AGGCAATCAAGAACGACGAA               | AGGCTCATCCAGACTCAGA        | NA                 | NA                                  |
| Apc Exon 15-5 | chr18: 26,786,008 + 26,787,066  | CTTCTGACGCTCCCTGGAC                | GCTTGTGGCTTCTCCTTTG        | NA                 | NA                                  |
| Apc Exon 15-6 | chr18: 26,787,047 + 26,788,273  | CAAAGGAAAGAACCCAAAGC               | GACTTCAGGGACAGGATGGA       | NA                 | NA                                  |
| Apc Exon 15-7 | chr18: 26,788,000 + 26,789,006  | AGAGGAGGCTTCCAGACTC                | CAAAGCTTTTGTGCTGA          | NA                 | NA                                  |
| Apc Exon 15-8 | chr18: 26,788,977 + 26,790,026  | CAGCAAAAACCTCAGCAAAACA             | AAAGGAGTTCAGGGGTTTT        | NA                 | NA                                  |
| Apc Exon 15-9 | chr18: 26,789,791 + 26,790,663  | AGATGGCACTGCTGTTTCT                | AAAGGACAAATGGAACGGATG      | NA                 | NA                                  |
| SNP-76        | chr1: 7,422,419 - 7,422,495     | Biotin-TCCTCAAAGTGTTCACCA          | GAGGAGGCTGCTGCTGTTG        | CTTCACTATCTGGATCTG | GAAACC[G/T]CGTGGTTGAA<br>CACTT      |
| SNP-102       | chr1: 45,963,406 - 45,963,533   | Biotin-ATGAGGGCTCAAAA<br>AATTACCTA | GTGTGCTTATTATTTGGGCTATG    | CTGTTATTTCTTACCAT  | G[CT]AGATTTCAGGGGATGAATT<br>CATGTCA |
| SNP-82        | chr1: 131,354,285 - 131,354,366 | Biotin-GGGAGCGGAAC<br>AACTGAAG     | CTCTGGGTACCTGGCAAAG        | TCCATCTGCCTCTGGCTG | AGC[T/C]GCTCTGCATCCCTCT             |
| SNP-75        | chr1: 158,844,845 + 158,844,927 | Biotin-AAGAGAGCGGG<br>TTCTCAGGT    | ACAGAGACCCGGGAGGAG         | GAGGGCAGCGATGACGAC | ACCTC[G/A]CTCACCTGAGAA<br>CCGCCT    |
| SNP-83        | chr1: 231,882,065 - 231,882,156 | Biotin-CCACTGCGAAG<br>AGATTAC      | AGTGGGAACCTCACTGTCTG       | TGCCTTCAGCTTCTCTGA | GCCTCTT[T/C]GGTGAATCTCTCG           |
| SNP-2         | chr1: 232,855,852 - 232,855,932 | Biotin-ACCCCATGTTGT<br>GTGACT      | CCTGAGACGGAAAACTGGA        | AGGTAACCTGGAAGGA   | GTGACTGCCCCCATT[T/C]CTCC<br>CTTCC   |
| SNP-58        | chr4: 75,039,070 + 75,039,137   | CCAAGTCTGCTACTTCCCTCA              | Biotin-GAACATCCATGCGACATCC | AGGGCGGACTCAGTGCTT | ACTCAGTGCCTT[C/G]TTTCCA<br>AGCGAT   |

Table S4. Cont.

| Primer name     | Location                        | Forward                           | Reverse                              | Sequencing                | SNP with surrounding sequence       |
|-----------------|---------------------------------|-----------------------------------|--------------------------------------|---------------------------|-------------------------------------|
| SNP-61          | chr7: 71,279,026 + 71,279,107   | GCATGCCCTGTATCAAGACC              | Biotin-GCTTCCTTTCTTA<br>TGTCTTGTGG   | GACCATGTATGCAGTGCT        | ATGTATGCAGTGCTA[C/G]TGTGCTGGAGT     |
| SNP-13          | chr7: 128,110,496 – 128,110,607 | Biotin-TGGCTAAGAAGTGAA<br>TCACGAA | GCAGAGCCTCAGGCAATTTA                 | TTCATCTCTTTGGGGTA         | CAATGACTTAGA[A/G]GTACCCC<br>AAAGAA  |
| SNP-65          | chr10: 25,359,997 + 25,360,102  | Biotin-CCTTCAAGAGCTC<br>CAAGCTG   | GGGAATGAGAAGGGAGTTGA                 | TTGTGAACATAAAGACAT        | CTTCACTACCCC[A/G]TATGTCTTTT         |
| SNP-27          | chr15: 13,867,393 – 13,867,502  | Biotin-ATTTGCTGGAATGG<br>CTTCTC   | GGAGGTTTCCTAATGGAGCTG                | GAATTAAGGACAGGTAA         | CTTTCTCTGAATCAC[A/G]C<br>TTACCTG    |
| SNP-28          | chr16: 9,709,784 + 9,709,903    | Biotin-GCCAAATACAACGC<br>AGACCT   | GGCATTGCCAGACTTTGAC                  | GGACAGACTTGGCTGAAA        | GTGCTCCATACTCAG[A/G]GATGT<br>ACTTG  |
| SNP-33          | chr18: 838,18,221 – 83,818,328  | Biotin-AGGCAAAGGA<br>TGATTCTCCT   | TGTCACCTGCCAATGAGGAC                 | AAAAAGTCCAGCTGCAG         | CCAGCCTGTCAGA[T/A]GGCCCCCT<br>AGGAG |
| Apc Min (Mouse) | chr18: 34,472,100 + 34,472,293  | TTTTGACGCCAATCGACATG              | Biotin-GATGGTAAGCACTGAG<br>GCCAATA   | CGTTCTGAGAAAAGACA<br>GAAG |                                     |
| Apc Pirc (Rat)  | chr18: 26,785,219 + 26,785,307  | ATGTGAACCAAGTCTTTGTG<br>TCAG      | Biotin- ATGCTGTTCTTCCTCAG<br>AATAACG | GGAAAGACGACTATGAAGAT      |                                     |

The list of PCR primers used for either the mutation detection in tumors or confirmation and allele-specific pyrosequencing of SNPs. Alt primers were used to confirm the alternative splicing between exons 13 and 14 (Fig. 2). Chr, chromosome.



## Other Supporting Information Files

[Dataset S1 \(PDF\)](#)
